# Supplementary material
Source: HighWire-hosted journal article supplement (doi:10.1101/rna.042309.113)
Supplement: SuppLegends.docx [file SuppLegends.docx]

**SUPPLEMENTAL MATERIAL**

**SUPPLEMENTAL FIGURE S1.** Characterization of selected box C/D snoRNAs from a *S. pombe* cDNA library.(A) Northern blot and (B) reverse transcription analyses for selected box C/D snoRNAs in *S. pombe.* Lane M, molecular weight markers. (C) Determination of 18S (upper) and 25S (lower) rRNA methylation sites predicted by snoRNAs. Primer extensions on total cellular RNA were performed with appropriate oligonucleotides selected downstream from the rRNA methylation sites for each snoRNAs (as indicated at the top of each panel). Lane T, G, C and A, the rDNA sequence ladder. Lane 1, control reaction at 1.5 mM dNTP. Lane 2, primer extension at 4 µM dNTP. The sites of ribose methylation were revealed by RT pauses at low dNTP concentrations. Arrows and solid boxed coordinates indicate potential methylation sites predicted by the novel snoRNAs. Arrows and dashed boxed coordinates indicate methylation sites modified by the previously known snoRNAs. Arrows without box refer to the modification sites with unknown molecules.

**SUPPLEMENTAL FIGURE S2.** Sequences of snoRNA gene cluster I-VII. The snoRNA sequences are indicated with shadows and gene names. The intron sequences are indicated with capital letters. The exon and untranscribed sequences are indicated with lowercase letters. The Homol-D box and TATA box are showed with bold capital letters. The TSSs and TTSs are showed with boxed bold lowercase letters.

**SUPPLEMENTAL FIGURE S3.**5', 3' RACE assays and poly(A) tail analyses of *S. pombe* snoRNA cluster I-VII.(A) 5' RACE assay of cluster I-VII. Lanes 1/2/3: positive results with different template quantities used in PCR. Lane 1: 1 µl cDNA as PCR template. Lane 2: µl cDNA as PCR template. Lane 3: µl cDNA as PCR template. TAP-: RNA treatment without tobacco acid pyrophosphatase. MLV-: reverse transcription without reverse transcriptase. Blank: PCR without template. M: DNA marker with indicated lengths. (B) RT-PCR results of cluster I-VII poly(A) tail analyses. RNA: reverse transcription without reverse transcriptase. cDNA: positive result of RT-PCR. DNA: positive control, using DNA as PCR template. Blank: PCR without template. M: DNA marker with indicated lengths. (C) 3' RACE assay of cluster I-VII. +: positive result of 3' RACE assay. MLV-: reverse transcription without reverse transcriptase. Blank: PCR without template. M: DNA marker with indicated lengths.

**SUPPLEMENTAL FIGURE S4.** Deletion schematics of (A) RRN7, (B) DDB1 and (C) rqh1 genes. (D) Schema of DDB1 over-expression plasmid.

**SUPPLEMENTAL TABLE S1.** The 44 box C/D snoRNAs identified from a *S. pombe* cDNA library.Box C, D', C' and D motifs are shaded and the short terminal inverted repeats are boxed. The primers used in northern blot and reverse transcription assays are underlined.

**SUPPLEMENTAL TABLE S2.** Box C/D snoRNAs in *S. pombe* that function as methylation guides.All listed snoRNAs are identified from *S. pombe* cDNA sequences in this work. snoRNAs annotated in other studies are underlined. Methylation sites that were experimentally confirmed in *S. pombe* rRNA are in boldface. "match/mismatch" column refers to the number of base pairing (G-U included) and mismatches found within the snoRNA complementary region-rRNA duplex. "Chr" refers to the chromosome of snoRNA belongs to. Homolog in only one of two sequence complementarity to rRNA between *S. pombe* and *S. cerevisiae* snoRNAs are denoted by 5' or 3' in parentheses, respectively. Nd, methylation site but no snoRNA identified. Hyphen denotes no methylation site and no snoRNA. "/" refers to no systemic name corresponding to snoRNA. snR52, snR60-I and snR66 have two accession numbers, respectively.

**SUPPLEMENTAL TABLE S3.** Over-represented motifs upstream of RP and box C/D snoRNA genes.The percentages of RP genes and snoRNA genes containing motifs are listed in columns RP and snoRNA, respectively.

**SUPPLEMENTAL TABLE S4.** Primers and oligonucleotides used in this study.

**SUPPLEMENTAL DATASET S1.** Fission yeast snoRNA alignments.

**SUPPLEMENTAL METHODS.**
