# Supplementary material
Source: HighWire-hosted journal article supplement (doi:10.1101/rna.042309.113)
Supplement: Supplemental_Table_S1.docx [file Supplemental_Table_S1.docx]

**Supplemental Table S1. The 44 box C/D snoRNAs identified from a *S. pombe* cDNA library.**

| **snoRNA** | **snoRNA sequence** |
| --- | --- |
| U14 | TCAACAGGTGATGAAATTTCCATTGAACATTCGCAGTTTCCCCGGAGCGGCATACGAACCCAATTTTGCCGCAGATGTCGTGCATAGTCCTTCCTTTGGATGTCTGATGTTGTGA |
| U18 | AGCTATGATGACCAAAATTGGTCCGTGTTACTGAGCGGGATTAAGACCCCAGCAAACGAAGAGAAACCCAATTTTTAATTCTGATT |
| U24 | CTTTGCAATTGATGAAATATTTGCTTATGATCAATAAATGATTCTTTTATTATCACCAAGATCGCTGAGTGCTAAAG |
| U24b | AAGGAATGATGTTTAGATTAATATTTGCTACTTCGGAGGCCTTACGGCTCGATGAGACAAAACAAATCACCATATGTTCTGACTTT |
| snR38 | TTGTATGATGATACTATTTTTTTTTACAGTTATCCCTGTCTAAAGCATAGTGTTGAGAATGGTAAATCTGAATA |
| snR39 | GAAAAAGATGAACCTTTCACTCTTGGATTGCTAGTTTCGACGATGCTGCTCCAAAATACCATCTTTCGGCTGATTC |
| snR39b | CAAGATGATGACAACAAATTTCGGATAGCTAGCTTAGGCTGTGCGCGTTCCACAATTTACCATCTTTCGGGACTGATT |
| snR40 | TTTAATGATGATACACTGTCTCATGCACCACTCTCAGACATTTATTTGTCAGTGAAGAGGAACAGACCCTTTATTTCTGAAA |
| snR41-Ⅰ | ATGCAAGGACGAGAATTAGGTTTTTTAAACATTACATCCAACTGTAATGTTTTATGAAAATACTATAAATTAACCAATTGTTCCTACTGAGC |
| snR41-Ⅱ | AATCATTGTGATGATAAAACGACGAAAACAGCTGAATTCCTCATGTTGAATTCGTTATATTATTTTTTAAGTTTCAGCCTTGTCTGATCATGATT |
| snR47 | AAGCCCAGTGATGCTTTTTTGAATTTCTTCAACGGAGCCGTTTGTCTTATTGACATGCGATGTGGGACGATATTTGACATACTGAGGGCCA |
| snR48 | ATATATGATGATTTCCAATATCTGGCACCTCTTGTCTTATGGGATTCTTAAAAGTTTCTCGATGAACTTAACCTTTTGGAACTATATCTGATAT |
| snR51-Ⅰ | TGCCATGATGAGCCATTTTATATTTTGTATTCACACTGTCTGAATTTCTTGAAGATATACTGAAACTCTGAGCAAAGCCTGATT |
| snR51-Ⅱ | TTGCAAGGATGCTTAATCATCTGATTTAATGAGCCTGATGGTCTTGACAACCAAAATGCTGTCAACTTTGATTACTGAGCAA |
| snR52 | ATTTTGAAAATGATGAAAATAACGCGGATGAAATATATGTCCGAGAGCGCAAAAAATGTGTGGATATTTCCGTTGCCTTCCTTCTGATTCAAAAT |
| snR53 | CTTGCTAGTGATGTTTTTCTTTTATATTCTATGCTAATCATGAAATCTAATGATTATACTTTTATTTATAAAGACTGAAGCAAG |
| snR54 | CCTTATGATGCTCTTTGATTAACTTTCGTTCTTCCGCAATGACTTAATTGTCATGGGGTCAACTTTTTTATTTTACTGAAG |
| snR55 | GCTAAGATGATTATACTTTACCCCTTTCTGTTGGTGATAATCAATGATCCTCAGAAAACATGCATCACCGAATGAACA |
| snR56 | TATTGTGATGATACCAATTACAGACCTGTTCCAATGCAAATCTGTATATGAGGACAACCTAATATTGCCATTATTTCTGAGT |
| snR57 | AGTTGATGATGATCATTTCTGTTCCTAGTAGGGCATTCGATGCGGACACTTTTGTATTTTAGGAATTCTTCGTTGCTGAACT |
| snR58 | GCCTATGATGATTACCGTTTATTTAGATGCTAGACTTCTGAATTTCATCTTATGTAGCTACAAGGTTTTCTGAGG |
| snR60-Ⅰ | AAAGGATTTCTTTGATGATTCCAAAAAAGCATAGTTCAACTGAGCATCGTATGCTGAAACTTTTTCCATCTGATTTGCACGTCAGTCTGAGATTT |
| snR60-Ⅱ | AAATATTACTATGATGAGCAATTTGTGTCGCCCCTATCCGAAATCTGTGACGATTGACCCGGAAGCCAAATCCGATCTCTGAATATTT |
| snR61 | ATGTATGATGATACTTAATTTTCAGTTTTGCTTCTGAGAAAAGCTTGAAGACAACCTGATACCAAGAAACTCTCTATTATCTGACG |
| snR62 | CAAAGTGATGTGAAAAAAATTCTTATCTACATTGCCTGAATCATATAGATGAAAAACTATCTTGTTTACTGATTGT |
| snR63 | atttcagaggatgcgaaatatatacccaaattgtatagcaaggataacggggtaatcgttttggttgccttcttgcagtgataaagcattttgtcatagttacactgatgaaat |
| snR64 | ttgcgaagatgatttcttgatagggacaacagatttaattatgttgaaaaaaaatcgggaaaagatagtagatatatattgctgagcat |
| snR66 | CCAAAATATGATGATCGCAAATACAAAGAGTCAAGCACTGAAACGCGATAGCGTCTTGTTGAGTTATTTGGTCTGATTTTGG |
| snR68 | CAGGCATATGATGAGAACATATATTTTTATCTGAAAAAAATTGTTGAATAAAAATTTATGCGTTATCTTTCTGATGCCACA |
| snR69 | TACCATGATGAACACGAGCCAGAAGGCTCAATATTCTATTAAACCCAGCTCTTTGAACCAATAGTTGTGAAACGAGAAACAAGTTCTGAAC |
| snR70 | TTTAAGGATGATACCTAAGACGCAACGGGCGGACTAAATGGGTTACTACAATGCTTCAACTGTACAATGAAGTTGTAACTCACATGTTGTTATCGTGTCTTACTGAAA |
| snR71 | TTACCATGATGATTTTCTTCGTTAAACCCAGCTCACTCGGAGTATTTACATTGACGAGTACGCGAAGTTTTTATTTATCTGAACA |
| snR73 | TCACATGATGTTTTTACTTTAATCACGACGGTCTACGTAGTTTCTACATTGACGAAGATTGCCTGTGACAAGGCGCTTTTTCTGAATGTA |
| snR74 | TTATTAGGATGATTTATTAAATTTCAAAGACAAGCATATGTCTGATGCCATTGGTTTTGAAGAAGTGAAATGCGTCTGATTATAGACA |
| snR75 | CTCAATGAGGAATAATTAGATGACGAGTCTGATTCAATATGAAGAAAAGACTCTTAAAATTCCATTCATGCTAACTGAGAGAACA |
| snR77 | TGGAAAAGATGAAAAAAACTTTTTTTTGGAATTACCGGCCTAGGAATAGTTTACTCCTATTCCGCTGAAGAATAAATGTGCTGCAATTATGCTGATCCAT |
| snR78 | ATCTTTGATGACCATTTTTTAAAATACAAACTAGAGTTTCTGATTAATTTATGATTTCAAATTCTTGCTGAGTTTAGT |
| snR79 | ACTACGCTGATGACACTGTATTTGATGCTGGAGAATCCGTTCGGTGAAGGCACAATGATTTCTCAAAAGACTACAACGGTATCTGAGTGGT |
| snR80 | tgaatgatgatgaacaatatgctggcacccgtctcatctcttcgttattgtcgaaagaaatgatgattattttgctggacaccaaatacgCtggggtccctgatttca |
| snR81 | TGTTCTGATGATATTATTATGTCTTCTTTACCCGTCCTATCGACTATGACGATAACTTTGTCTCCACTATAGGTGGAGACCATACTTGCCAGTATCTTCGATGTCTGAAT |
| snR82 | TGTCGAATGATTAAATGTATGAATTTTTATCAATCTGTCAATCCCCTGAGATTTTCATTGAAGAGAATATTCATCGAATTATGACGGCA |
| snR83 | TACATATGATGCTTTACAAATCGATTAGTCTTGAAGACACAACTATGTGGTTAAATTTTTATACTTGTATACTGACGTC |
| snR84 | TGCGTTTTGATGAGGATTATTTTAACTCGCTAAATTTTCATGAGCGCAAAGTTTAAACACTCTAATTTTTTGCTGAACGCT |
| snR85 | TTGTATGATGACTATAATTTGCGATTGAGCGATGGTATTGCTCGGGATCTTGCCTGATTCCCATATGGGCTCCATCAGTATGCGACAAATAATCTTCTGATTGAT |

Box C, D', C' and D motifs are shaded and the short terminal inverted repeats are boxed. The primers used in northern blot and reverse transcription assays are underlined.
