# Supplementary material
Source: HighWire-hosted journal article supplement (doi:10.1101/rna.042309.113)
Supplement: Supplemental_Table_S2.docx [file Supplemental_Table_S2.docx]

**Supplemental Table S2. Box C/D snoRNAs in *S. pombe* that function as methylation guides.**

| **snoRNA Systematic Name** | | **Target**  **2'-O-Methyl site** | **Match/**  **Mismatch** | **Genomic**  **Placement** | **chr** | **Accession**  **No.** | **S.cerevisiae** | **Homologous**  **A.thaliana** | **Human** |
| --- | --- | --- | --- | --- | --- | --- | --- | --- | --- |
| U14 | SPSNORNA.21 | 18S-Cm417 | 10/0 | exonic/CⅤ | Ⅱ | U29583 | U14 | U14 | U14 |
| U18 | SPSNORNA.26 | 25S-Am674 | 12/0 | intronic | Ⅱ | AJ617355 | U18 | U18 | U18 |
| U24 | SPSNORNA.18 | **25S-Cm1471** | 11/0 | Intronic/CⅥ | Ⅰ | AJ222770 | U24 (3’) | U24 | U24 |
|  |  | 25S-A1486 | 10/0 |  |  |  |  |  |  |
| U24b | SPSNORNA.11 | **25S-Am1483** | 15/0 | intronic | Ⅰ | AJ617313 | U24 (5’) | U24 | U76 |
| snR38 | SPSNORNA.15 | **25S-Am1484**  **25S-Gm2909** | 13/0 | intronic | Ⅰ | U26013 | snR38 | snoR38Y | snR38 |
| snR39 | SPSNORNA.31 | **25S-Am839** | 13/0 | intronic | Ⅰ | U26014 | snR39/59 | U51 | U51/U32a |
| snR39b | SPSNORNA.24 | **25S-Gm837** | 16/0 | intronic | Ⅱ | AJ617314 | snR39b | snoR39bY | snR39b |
| snR40 | SPSNORNA.01 | 18S-Gm1288 | 11/0 | intronic | Ⅰ | AJ617315 | snR40 (5’) | snoR21 | U32 |
| snR41-Ⅰ | / | **18S-Am544** | 12/0 | intronic | Ⅰ | AJ617316 | snR41 (5’) | snoR41Y | U62 |
| snR41-Ⅱ | SPSNORNA.07 | 18S-Gm1142 | 18/0 | intronic/CⅢ | Ⅰ | AJ617317 | snR41 (3’) | - | - |
| snR47 | SPSNORNA.27 | 25S-Am2307 | 13/0 | intronic | Ⅱ | AJ617318 | snR47 (5’) | U36a | U36 |
| snR48 | / | **25S-Gm2887** | 12/0 | intronic | Ⅱ | AJ617319 | snR48 | Nd | U60 |
| snR51-Ⅰ | SPSNORNA.09 | 25S-Um2823 | 15/0 | exonic/CⅢ | Ⅰ | AJ617320 | snR51 (5’) | - | U41 |
| snR51-Ⅱ | / | 18S-Am101 | 15/0 | intronic | Ⅲ | AJ617321 | snR51 (3’) | - | U57 |
| snR52 | SPSNORNA.29 | **18S-Am423** | 12/0 | intronic | Ⅰ | AJ617322 | snR52 (3’) | - | U83 |
|  |  |  |  |  |  | (AJ251862) |  |  |  |
| snR53 | / | **18S-Am811** | 11/0 | exonic/CⅣ | Ⅲ | AJ617323 | snR53 | snoR53Y | - |
|  |  | U6-Am47 | 11/0 |  |  |  |  |  |  |
| snR54 | SPSNORNA.22 | 18S-Am989 | 15/0 | intronic | Ⅱ | AJ617324 | snR54 | U59 | U59 |
|  |  | 25S-Am2786 | 16/0 |  |  |  |  |  |  |
| snR55 | / | 18S-Um1286 | 12/0 | intronic/CⅡ | Ⅱ | AJ617325 | snR55 | U33 | U33 |
| snR56 | SPSNORNA.16 | **18S-Gm1448** | 14/0 | intronic | Ⅰ | AJ617326 | snR56 | snoR19 | U25 |
| snR57 | / | 18S-Gm1613 | 16/0 | intronic/CⅡ | Ⅱ | AJ617327 | snR57 | - | - |
|  |  | 25S-Am2770 | 10/0 |  |  |  |  |  |  |
| snR58 | SPSNORNA.17 | 25S-Cm688 | 16/0 | intronic | Ⅰ | AJ617328 | snR58 | snoR58Y | Z12 |
| snR60-Ⅰ | SPSNORNA.23 | **25S-Am849** | 10/0 | intronic | Ⅱ | AJ617329 | snR60 (5’) | U80 | U80/U77 |
|  |  | **25S-Am908** | 14/0 |  |  | (AJ223844) | snR72 | snoR72Y |  |
| snR60-Ⅱ | / | **25S-Gm940** | 10/0 | intronic/CⅣ | Ⅲ | AJ617337 | snR60 (3’) | U80 | U80 |
| snR61 | SPNCRNA.445 | 25S-Am1164 | 11/0 | exonic/CⅡ | Ⅱ | AJ617330 | snR61 | U38 | U38 |
| snR62 | SPSNORNA.30 | 25S-Um1942 | 14/0 | intronic | Ⅰ | AJ617331 | snR62 | U34 | U34 |
| snR63 | / | 25S-Um930 | 12/0 | intronic | Ⅲ | AJ617334 | snR40(3’) |  |  |
|  |  | 25S-Am2343 | 11/0 |  |  |  | snR63 | U40 | U40/U46 |
| snR64 | / | 25S-Cm2424 | 10/0 | intronic | Ⅰ | AJ617335 | snR64 | snoR44 | U74 |
| snR66 | SPSNORNA.10 | 25S-Um2504 | 10/0 | intronic | Ⅰ | AJ617336 | snR66 | - | - |
|  |  |  |  |  |  | (AJ010685) |  |  |  |
| snR68 | SPSNORNA.28 | 25S-Am2734 | 12/0 | intronic | Ⅱ | AJ617338 | snR68 | snoR68Y | - |
| snR69 | SPSNORNA.13 | **25S-Cm3042** | 13/0 | intronic | Ⅰ | AJ617339 | snR69 | snoR69Y | - |
|  |  | 18S-Um1729 | 11/0 |  |  |  |  |  |  |
| snR70 | SPSNORNA.08 | 18S-Cm1680 | 10/1 | intronic/CⅢ | Ⅰ | AJ617340 | snR70 | U43 | U43 |
| snR71 | SPSNORNA.19 | **25S-Am3040** | 15/0 | intronic | Ⅰ | AJ617341 | snR71 | U29 | U29 |
| snR73 | SPSNORNA.06 | **25S-Cm3053** | 13/0 | intronic/CⅠ | Ⅰ | AJ251856 | snR73 | U35 | U35 |
| snR74 | SPSNORNA.05 | 18S-Am28 | 13/0 | intronic/CⅠ | Ⅰ | AJ251855 | snR74 | U27 | U27 |

| snR75 | SPSNORNA.04 | 25S-Gm2375 | 12/0 | intronic/CⅠ | Ⅰ | AJ251854 | snR75 | U15 | U15 |
| --- | --- | --- | --- | --- | --- | --- | --- | --- | --- |
|  |  | 18S-Cm813 | 10/0 |  |  |  |  |  |  |
| snR77 | SPSNORNA.03 | **18S-Um581** | 12/0 | intronic/CⅠ | Ⅰ | AJ251853 | snR77 | snoR77Y | Z62 |
| snR78 | SPSNORNA.02 | **25S-Um2508** | 12/0 | intronic/CⅠ | Ⅰ | AJ251852 | snR78 | U52 | U52 |
| snR79 | SPSNORNA.54 | 18S-Cm1022 | 19/1 | intronic | Ⅰ | AJ617347 | snR79 | - | - |
| snR80 | / | **18S-Gm565** | 10/0 | Intronic/CⅦ | Ⅰ | AJ617348 | - | - | - |
| snR81 | / | **25S-Gm2481** | 14/1 | intronic/CⅤ | Ⅱ | AJ617349 | snR190 | - | Z63 |
| snR82 | SPSNORNA.12 | **18S-Um1248** | 15/0 | intronic | Ⅰ | AJ617350 | - | snoR14 | Z61 |
| snR83 | / | **25S-Am949** | 12/0 | intronic | Ⅲ | AJ617351 | - | - | - |
| snR84 | / | **18S-Am768** | 19/1 | intronic | Ⅲ | AJ617352 | - | - | - |

snR85 / - - intronic/CⅥ Ⅰ AJ617353 - - -

All listed snoRNAs are identified from *S. pombe* cDNA sequences in this work. snoRNAs annotated in other studies are underlined. Methylation sites that were experimentally confirmed in *S. pombe* rRNA are in boldface. "match/mismatch" column refers to the number of base pairing (G-U included) and mismatches found within the snoRNA complementary region-rRNA duplex. "Chr" refers to the chromosome of snoRNA belongs to. Homolog in only one of two sequence complementarity to rRNA between *S. pombe* and *S. cerevisiae* snoRNAs are denoted by 5' or 3' in parentheses, respectively. Nd, methylation site but no snoRNA identified. Hyphen denotes no methylation site and no snoRNA. "/" refers to no systemic name corresponding to snoRNA. snR52, snR60-I and snR66 have two accession numbers, respectively.
