# Supplementary material
Source: HighWire-hosted journal article supplement (doi:10.1101/rna.042309.113)
Supplement: Supplemental_Table_S3.docx [file Supplemental_Table_S3.docx]

**Supplemental Table S3. Over-represented motifs upstream of RP and box C/D snoRNA genes.**

| **Species** | **Motif** | **RP** | **snoRNA** | **Annotation** |
| --- | --- | --- | --- | --- |
| *Y.lip* | 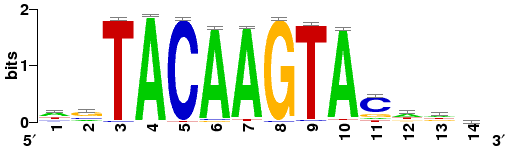 | 60.47% | 66.67% | NA, N1 in Fig. 4 |
| 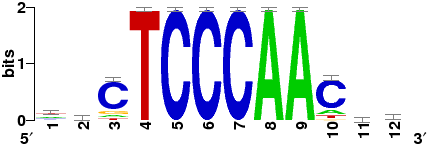 | 67.44% | 41.67% | NA, N2 in Fig. 4 |
| 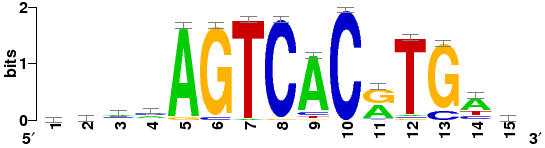 | 55.81% | 37.50% | Putative TYE7/CBF1/ARG81 binding sites |
| *Z.rou* | 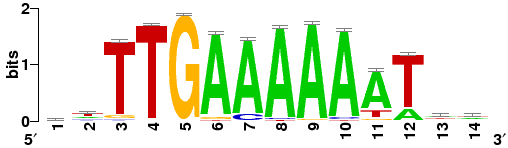 | 62.26% | 60.00% | Putative STB3/SUM1 binding sites |
| 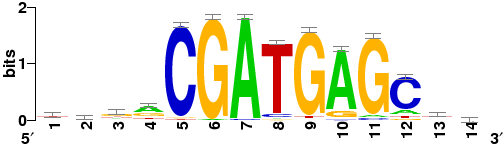 | 50.94% | 46.67% | Putative DOT6/TOD6/DAL80 binding sites |
| *C.alb* | 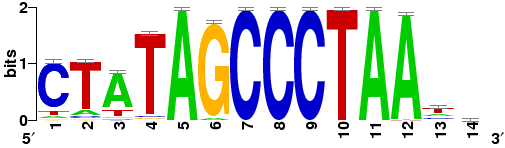 | 78.79% | 36.67% | Putative TBF1/RPH1 binding sites |
| 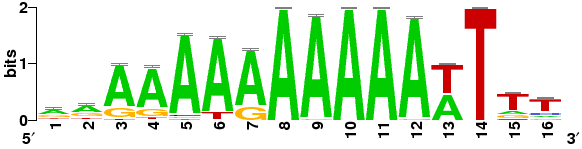 | 72.73% | 76.67% | Putative SFP1/SUM1/AZF1 binding sites |
| 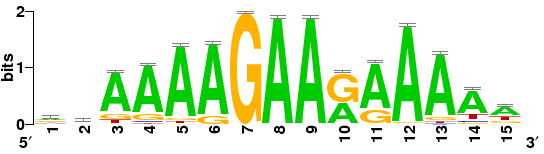 | 71.21% | 80.00% | Putative AZF1/SFL1 binding sites |
| 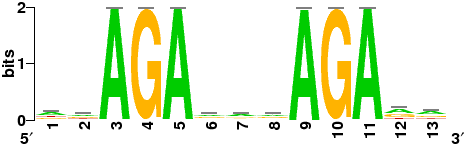 | 66.67% | 76.67% | NA |
| 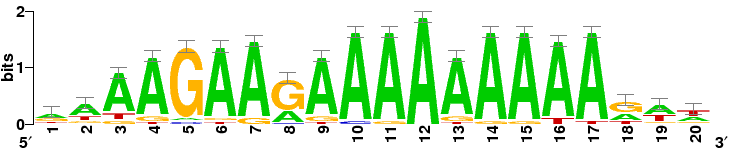 | 65.15% | 76.67% | NA |
| 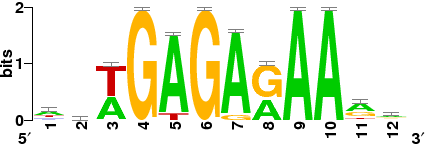 | 63.64% | 46.67% | NA |
| 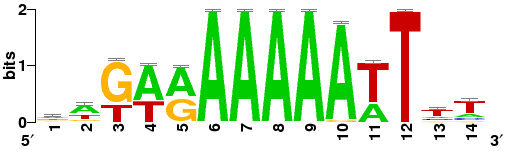 | 56.06% | 60.00% | Putative SFP1/SUM1/STB3 binding sites |
| 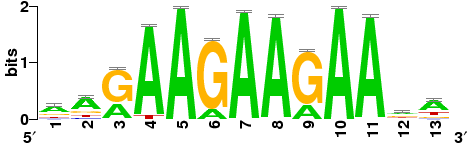 | 53.03% | 83.33% | Putative AZF1 binding sites |
| *D.han* | 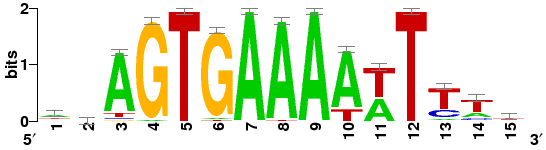 | 69.33% | 46.43% | Putative STB3/SUM1 binding sites |
| 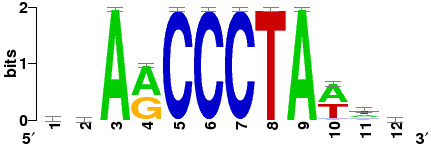 | 44.00% | 57.14% | Putative TBF1/RPH1 binding sites |
| *S.jap* | 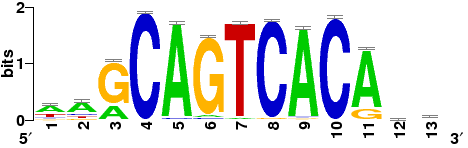 | 51.54% | 62.07% | Homol-D box |
| *S.pom* | 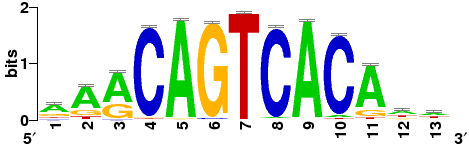 | 52.24% | 48.28% | Homol-D box |
| *S.cry* | 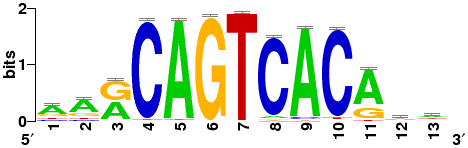 | 57.03% | 41.38% | Homol-D box |
| 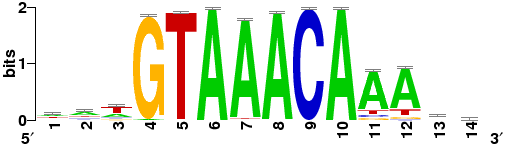 | 44.53% | 65.52% | Putative FKH2/FKH1/HCM1 binding sites |
| *S.oct* | 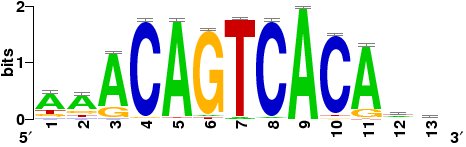 | 51.13% | 41.38% | Homol-D box |
| 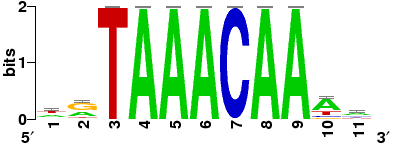 | 46.62% | 58.62% | Putative FKH2/FKH1/HCM1 binding sites |

The percentages of RP genes and snoRNA genes containing motifs are listed in columns RP and snoRNA, respectively.
