# Supplementary material
Source: HighWire-hosted journal article supplement (doi:10.1101/rna.042309.113)
Supplement: Supplemental_Table_S4.docx [file Supplemental_Table_S4.docx]

**Supplemental Table S4. Primers and oligonucleotides used in this study.**

| **Primer** | **Sequences(5'-3')** | **Annotation** |
| --- | --- | --- |
| dT16-Hind | CCCCAAAAGCTTTTTTTTTTTTTTTT | cDNA library construction |
| PolyC | GGAATTCGGATCCCCCCCCCCCCCCCC |
| PU18 | AATTGGGTTTCTCTTCGTTTGC | Northern blot and  reverse transcription |
| PU24b | AGTCAGAACATATGGTGATT |
| PsnR39 | GAATCAGCCGAAAGATGGTA |
| PsnR39b | AATCAGTCCCGAAAGATGGT |
| PsnR41-Ⅱ | GATCAGACAAGGCTGAAACT |
| PsnR47 | CCTCAGTATGTCAAATATCG |
| PsnR48 | ATCAGATATAGTTCCAAAAGGT |
| PsnR52 | AATCAGAAGGAAGGCAACGG |
| PsnR55 | TGTTCATTCGGTGATGCATG |
| PsnR60-Ⅰ | CTCAGACTGACGTGCAAATC |
| PsnR62 | AATCAGTAAACAAGATAGTT |
| PsnR63 | TCATCAGTGTAACTATGAC |
| PsnR64 | GCTCAGCAATATATATCTAC |
| PsnR66 | ATCAGACCAAATAACTCAAC |
| PsnR68 | CATCAGAAAGATAACGCATA |
| PsnR71 | CAGATAAATAAAAACTTCGCG |
| PsnR79 | ACTCAGATACCGTTGTAGTC |
| PsnR80 | ATCAGGGACCCCAGCGTATTTG |
| PsnR81 | ATTCAGACATCGAAGATACTG |
| PsnR82 | CGATGAATATTCTCTTCAATG |
| PsnR83 | GACGTCAGTATACAAGTAT |
| PsnR84 | GCGTTCAGCAAAAAATTAGAG |
| PsnR85 | ATCAGAAGATTATTTGTCGC |
| 18SM565 | CTCAAACTTCAACTACGAGC | Detection of rRNA ribose-methylated nucleotides by reverse transcription |
| 18SM768 | CAAAATAGAACCACACGTCCT |
| 18SM1248 | GAACGGCCATGCACCACCACC |
| 18SM1509 | CGGACTTTAACTTGATTTACCC |
| 18SM1729 | AGTTTGTCCAACTTCTCGGC |
| 25SM952 | GAGTTTCTGCTATCTGAGGG |
| 25SM2887 | GTCGCTATGAACGCTTGGC |
| 25SM3040 | CGACGACACTTCATCAGTAG |
| 25SM1483 | AACCTTTCCCCACTTAGTC |
| 25SM2508 | TACTCCCACTTATCCTACACC |
| Sp25F | CCTCAAATCAGGTAGGACTAC | Amplification of 18S and 25S rRNA gene fragments |
| Sp25R | GGCTTAATCTCAGCAGATCG |
| Sp18F | TACCTGGTTGATCCTGCCAG |
| Sp18R | TGATCCTTCCGCAGGTTCACC |
| snR74-PF | GTCTGATGCCATTGGTTTTGA | Detection of poly(A) tail of snoRNA cluster transcripts |
| Ⅰ-RT | GTCACAGGCAATCTTCGTCAAT |
| snR55-PF | TACCCCTTTCTGTTGGTGATAA |
| Ⅱ-RT | TCTTGGTATCAGGTTGTCTTCA |
| snR70-PF | GGGCGGACTAAATGGGTTAC |
| snR51-Ⅰ-PR | CAGGCTTTGCTCAGAGTTTCA |
| snR60-Ⅱ-PF | CCCCTATCCGAAATCTGTGA |
| Ⅳ-RT | ATTGCTTGCTTCAGTCTTTAT |
| snR81-PF | TGTCTTCTTTACCCGTCCTATC |
| Ⅴ-RT | CCACTACAACTACAAGCCAAAC |
| U16-PF | ATTTGCGATTGAGCGATGGTAT |
| U24-PR | GCACTCAGCGATCTTGGTGATA |
| Ⅶ-PF | TTTGGGTTCCATCCTTGTTA |
| snR80-PR | GGTGCCAGCATATTGTTCAT |
| CⅠ-5-outer | TGTTAGCATAAGTGTTGAAATAACC | Detection of TSS of snoRNA cluster transcripts by 5' RACE |
| CⅠ-5-inner | CAACTAAACTCAGCAAGAATTTGAA |
| CⅡ-5-outer | TGAGTTAGTTCAGCAACGAAGAA |
| CⅡ-5-inner | ATGCCCTACTAGGAACAGAAATG |
| CⅢ-5-outer | GTTTTCGTCGTTTTATCATCAC |
| CⅢ-5-inner | AGTAGTAAAGCTACAGGAACTTCTG |
| CⅣ-5-outer | ATATTCAGAGATCGGATTTGG |
| CⅣ-5-inner | GATTTCGGATAGGGGCGACACA |
| CⅤ-5-outer | TGGAGACAAAGTTATCGTCATAGTC |
| CⅤ-5-inner | GATAGGACGGGTAAAGAAGACATA |
| CⅥ-5-outer | ATTTGTCGCATACTGATGGAG |
| CⅥ-5-inner | TCAGGCAAGATCCCGAGCAATACC |
| CⅦ-5-outer | GCACCTGAGGGTAAAGTGAGTAT |
| CⅦ-5-inner | GAAGGAAATACGCTCATAAACTGTG |
| CⅠ-3-outer | CATTGACGAAGATTGCCTGTG | Detection of TTS of snoRNA cluster transcripts by 3' RACE |
| CⅠ-3-inner | TTTTAGTGTCGGTTCGTTTA |
| CⅡ-3-outer | GCTTGAAGACAACCTGATACCA |
| CⅡ-3-inner | ACAACCTGATACCAAGAAACTC |
| CⅢ-3-outer | CAACTTGCCATGATGAGCCATT |
| CⅢ-3-inner | GAAACTCTGAGCAAAGCCTGAT |
| CⅣ-3-outer | GAAAAATGTTCCTTGCTAGTGATG |
| CⅣ-3-inner | CAAGCAAAGAGGTTGTCGTATC |
| CⅤ-3-outer | ATTGAACATTCGCAGTTTCCCCG |
| CⅤ-3-inner | GCATAGTCCTTCCTTTGGATGTCTG |
| CⅥ-3-outer | CCAAGATCGCTGAGTGCTAAA |
| CⅥ-3-inner | TCGCTGAGTGCTAAAGTTTTTGGTT |
| CⅦ-3-outer | TATGCTGGCACCCGTCTCATCTCTT |
| CⅦ-3-inner | TGCTGGACACCAAATACGCT |
| Ⅰ-PF1 | GATGATATCTTTCTGTCACGAGCATTT | Plasmids construction and mutant strain selection |
| Ⅰ-PR1 | TTCGATATCTTCAGCGGAATAGGAGTA |
| Ⅰ-PFV1 | AAAGGTACCATCCTAACTTGAGTATCTT |
| Ⅰ-PRV1 | TCCGTCGACCAACTAACAACGCCGTATA |
| Ⅰ-PFV4 | TAAGGTACCGCTGTGACTCTCTTGCATCTAAAC |
| Ⅰ-PRV4 | AGCGTCGACTTATATAGAAATTTTGTTT |
| DDB1-PF | TTTTTGAGGGCATTACTGAAGTTGG |
| DDB1-PR | AACAACTGTGGTGTGACAAGGGATT |
| DDB1-PFV | AGGGGTACCACGAAATCATCGCAGCAG |
| DDB1-PRV | CCTGTCGACCCATCATCACCGTATTTC |
| rqh1-PF | AAAACTAAATATACCTTCGCTACCGC |
| rqh1-PR | GTCGCCTTTGTCAACTCCCATA |
| rqh1-PFV | ATCGGTACCGCTTCATTAGCAACGGTC |
| rqh1-PRV | GCTGTCGACGTCAACGCCATAAAAGGA |
| RRN7-PF | CAAGTGTTCAAACCTGTAGGCATTA |
| RRN7-PR | TTTAGGCTTCGATTTAGAAACTGCT |
| RRN7-PFV | CATGGTACCCTATTTTTTGTCCTTACTAT |
| RRN7-PRV | TATGTCGACTTAATCTTGATTGTGTATA |
| DDB1-PF2 | ACCGAGCTCATGACTTATGTTACTTATT | Plasmid construction and over-expression strain selection |
| DDB1-PR2 | ACTGGGCCCAGGATGTAGTTTCTCAAGA |
| Tag-PF2 | CGAGGGCCCTACCCATACGATGTTCCTG |
| Tag-PR2 | AGCCCCGGGTTAAGCGTAATCTGGAACGTC |
| ACT1-F | TTGTCTTTGTATGCCTCTGGTCG |  |
| ACT1-R | TCATAAATGGGAACAGTGTGGGT |  |
| RRN7-rt-PF | TCGTGGTCATGCTCAACATGTAAGT |  |
| RRN7-rt-PR | CCAGGTTCATCATCTTGAGCGATTT |  |
| DDB1-rt-PF | TAGATACCAGTGCGATACTGAGGTT |  |
| DDB1-rt-PR | TGTGAATAAACAATGCTACGAGGAA |  |
| rps102-PF | AGGAGCACGCATTCCGCAAG |  |
| rps102-PR | ATGACAAAGACACGGCAAAGATAA |  |
| rpl14-PF | TCTTCCCCTAACAAGTCACCACCAG |  |
| rpl14-PR | TGTCTACAAGCAATTTTCACGCTCT |  |
| rpl1902-PF | GCTCGTATGCCCTCTACTGTTGTT |  |
| rpl1902-PR | ATGCTTATCTATCTTACCAGACTCAC |  |
| rpl2802-PF | CCCTGTCATTGTTCAAACTCGC |  |
| rpl2802-PR | TTTCAAAATCAAAAGACGCCCC |  |
| rpl3002-PF | TTGAGAAACACTGTTTAATGGCTA |  |
| rpl3002-PR | CAATAACTGCTAATACACCGACGC |  |
| rpl44-PF | GAATGCTCAAAAGCCTGCCAAG |  |
| rpl44-PR | CGATAGCCAGTTCTGCCGAT |  |
| rpp203-PF | GCCAAGGAAGAAGAAGAATCTGACG |  |
| rpp203-PR | CGAACAAGCCGAATCCCATCTACAC |  |
| rps2202-PF | AATACTTGAACCCAATGGGTGGAAC |  |
| rps2202-PR | AACTTTAGAGGAAGGACGGATGAGC | real time RT-PCR |
| rps23-PF | CGCCGCAACCTCTATACTACAA |  |
| rps23-PR | CCTTAGCATGAGACGATCCACC |  |
| rps7-PF | GCGAAGTTGAAGTTGGAGGTGGA |  |
| rps7-PR | GAGAACGAGGACGCTTTTGAGTA |  |
| snR24b-PF | TCCTAACCCCGATAACCTTACCTTC |  |
| snR24b-PR | CATCATTCCTTGCTTGACTAAAAAC |  |
| snR39-PF | GGTCAATGAGCGTACTCGGAAAG |  |
| snR39-PR | TGGAGCAGCATCGTCGAAACTAG |  |
| snR39b-PF | CAACTTTACCACCAGACATCCAC |  |
| snR39b-PR | TTCAATCCATCCAAAGACAAATA |  |
| snR80-PF | TTCATTTTTCCTTTTCTCATTTGTA |  |
| snR80-PR | CGAAGAGATGAGACGGGTGC |  |
| rps2201-PF | CAAAACTTCTCTCATACCAGCAGC |  |
| rps2201-PR | CGCACTTGTTAATACGACCATTCA |  |
| snR38-PF | ACCCTTGCCATCGCTTTTTACTGT |  |
| snR38-PR | TCGTGGGCTTTTTCCTTTCTTCAT |  |
| snR78 | CTCAGCAAGAATTTGAAATCATA | Northern blot for  snR78 and U2 |
| NU2 | CTCAGTGAGGTGATTTCAGCGATT |
